# Supplementary material
Source: bioRxiv or medRxiv preprint supplement (https://www.biorxiv.org/content/biorxiv/early/2020/11/05/2020.11.03.367466/DC1/embed/media-1.pdf)

## Supplementary Materials

### Supplementary Table 1: Currently available miniaturized microscopes published specifications

| Microscope Name                         | Frame Rate | Neural Indicator (animal)          | Sensor Resolution | Pixel Size    |
|-----------------------------------------|------------|------------------------------------|-------------------|---------------|
| UCLA Miniscope<br>V3.2 <sup>3</sup>     | 60 Hz      | AAV-GCaMP6f (mouse)                | 752x480 pixels    | 6um           |
| miniScope <sup>20</sup>                 | 10 Hz      | AAV-GCaMP6s (mouse)                | 400x400 pixels    | 6um           |
| Wirefree miniScope <sup>6</sup>         | 10 Hz      | AAV-GCaMP6s (mouse)                | 200x200 pixels    | 6um           |
| Finchscope <sup>4</sup>                 | 30 Hz      | AAV-GCaMP6s and GCaMP6f<br>(bird)  | 640x480 pixels    | Not published |
| cScope <sup>7</sup>                     | 60 Hz      | Transgenic<br>Thy1-GCAMP6f (rat)   | 752x480 pixels    | 6um           |
| Multi-Contrast <sup>21</sup>            | 15 Hz      | Transgenic GCaMP6s (mouse)         | 640x640 pixels    | 3um           |
| MiniLFM <sup>9</sup>                    | 16 Hz      | AAV-GCaMP6f (mouse)                | 1280x1024 pixels  | 5.2um         |
| NINscope <sup>8</sup>                   | 30 Hz      | AAV-GCaMP6f (mouse)                | 808x608 pixels    | 4.8um         |
| Dual Hemisphere <sup>10</sup>           | 25 Hz      | Transgenic<br>Thy1-GCaMP6s (mouse) | 720x576 pixels    | 6um           |
| Wirefree UCLA<br>Miniscope <sup>5</sup> | 20 Hz      | AAV-GCaMP6f (mouse)                | 836x640 pixels    | 5.8um         |

**Supplementary Figure 1: MiniFAST image sensor PCB overview**

V3.2 Miniscope  
image sensor PCB

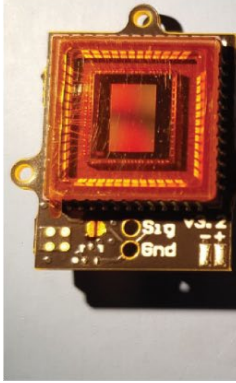

MiniFAST  
image sensor PCB

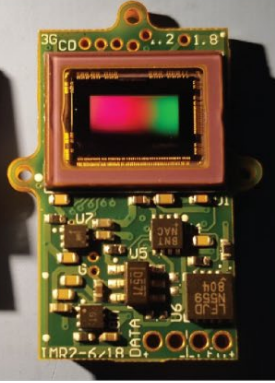

MiniFAST bottom of image sensor PCB

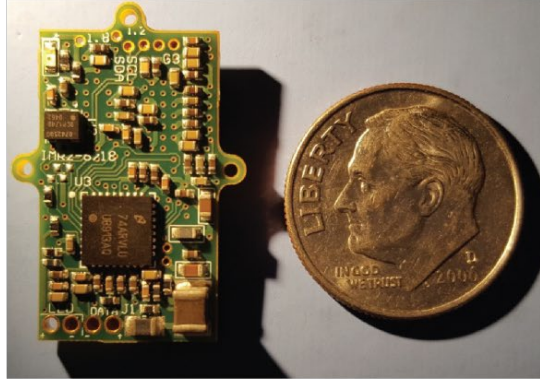

Size comparison

V3.2 Miniscope

MiniFAST

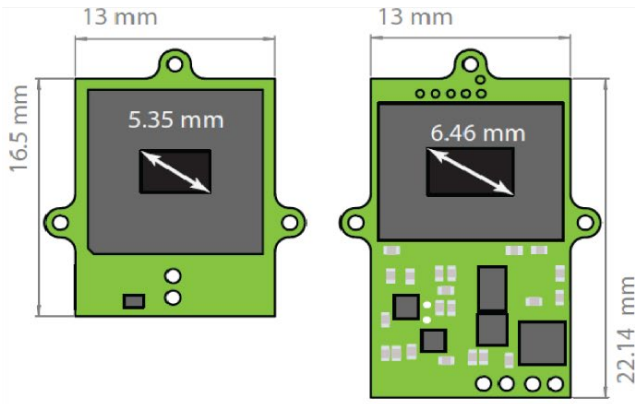

Altium Designer custom layout

Top layer

Bottom layer

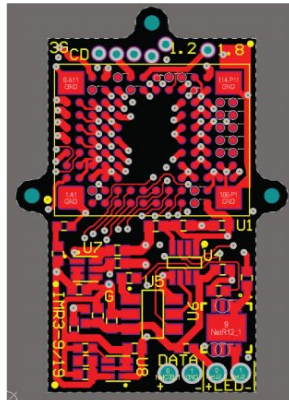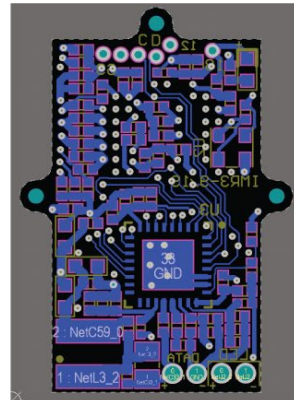

Adapted from figure in (Juneau et al., 2018<sup>29</sup>)

**Supplementary Table 2: Miniaturized microscope image sensor specification comparison**

| Parameters                    | Miniaturized Microscopes |                             |                                                      |
|-------------------------------|--------------------------|-----------------------------|------------------------------------------------------|
|                               | V3.2 UCLA Miniscope      | NINScope                    | MiniFAST                                             |
| Weight (PCB, housing, optics) | 3.2 g                    | 1.7 g                       | 3.45 g                                               |
| Image Sensor Manufacturer     | On Semi                  | On Semi                     | Sony                                                 |
| Image Sensor Model            | MT9V032                  | Python 480                  | IMX290LLR-C                                          |
| Shutter                       | Global                   | Global                      | Rolling                                              |
| Resolution (pixels)           | 752 x 480                | 808 x 608                   | <b>1920 x 1080 @ 30 Hz</b>                           |
| Pixel Size                    | 6 $\mu$ m                | 4.8 $\mu$ m                 | <b>2.9 <math>\mu</math>m</b>                         |
| Sensor Format                 | 1/3"                     | 1/3.6"                      | 1/2.8"                                               |
| Maximum Gain                  | 12 dB                    | 11 dB                       | <b>30 dB (analog)<br/>+ 42 dB (digital)</b>          |
| Max Frame Rate                | 60 Hz                    | 120 Hz<br>(NINscope @ 30Hz) | <b>&gt; 500 Hz<br/>(with decreasing window size)</b> |

# Supplementary Figure 2: High resolution test target extended figures

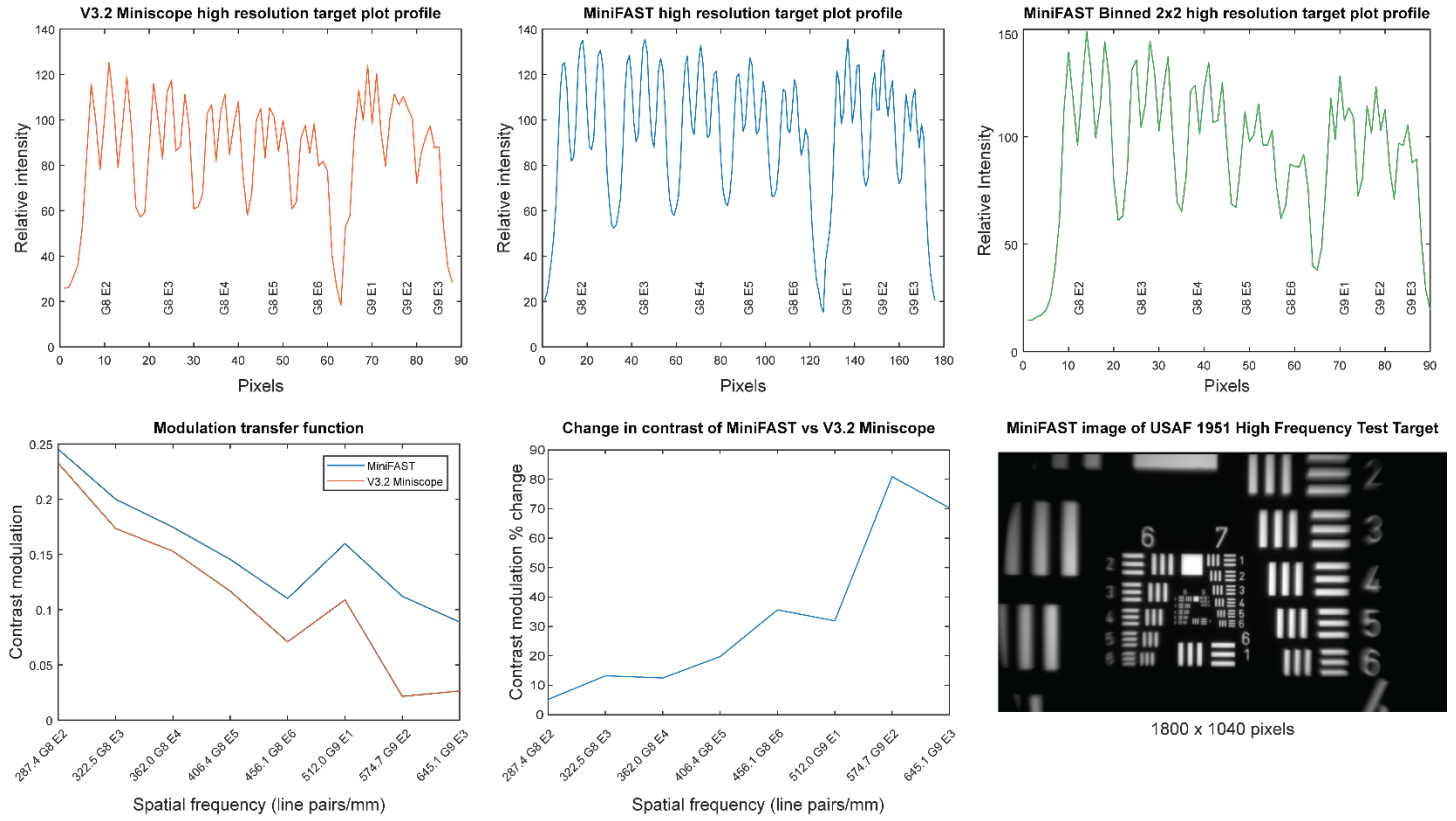

### Supplementary Figure 3: Detected place fields from exploration session

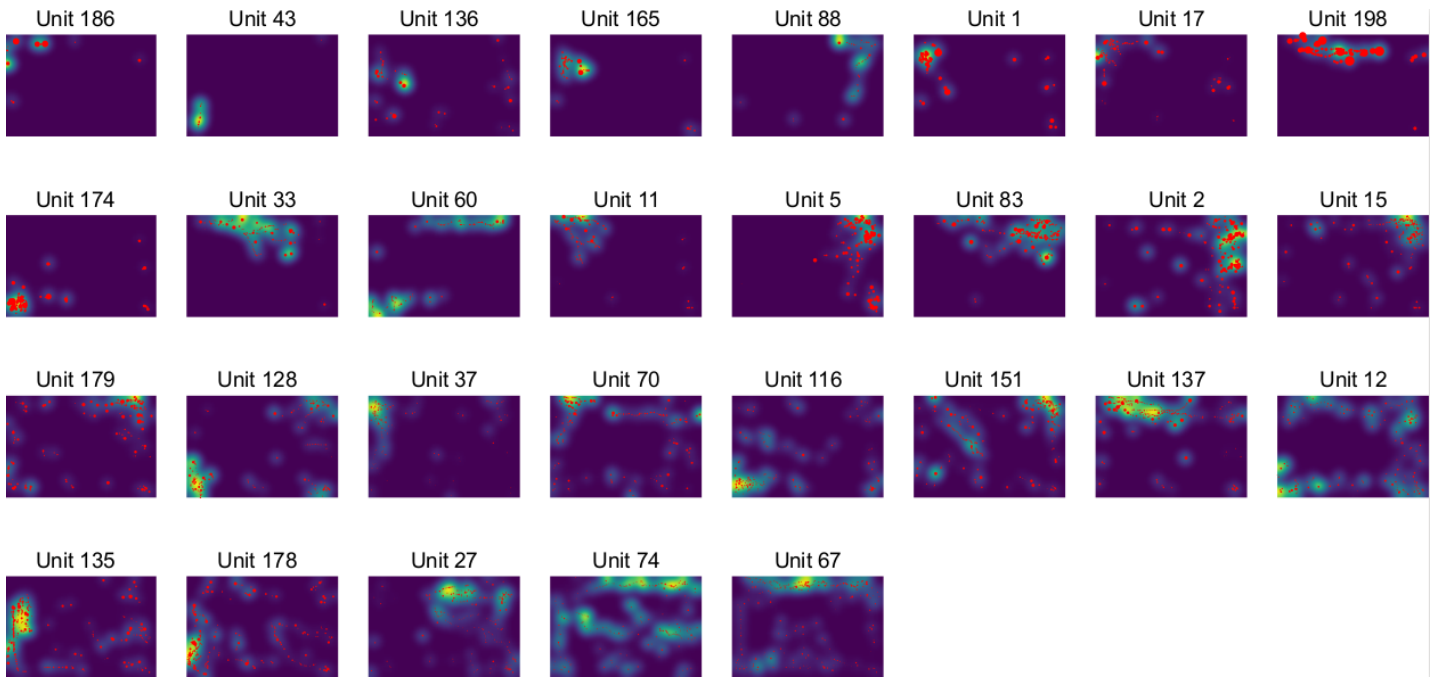

Deconvolved spikes (red) overlaid on inferred ratemaps for 29 neurons which displayed fields which were more spatially tuned than chance (i.e., place cells).



# Supplementary Figure 4: 2-Hour continuous imaging session of calcium imaging

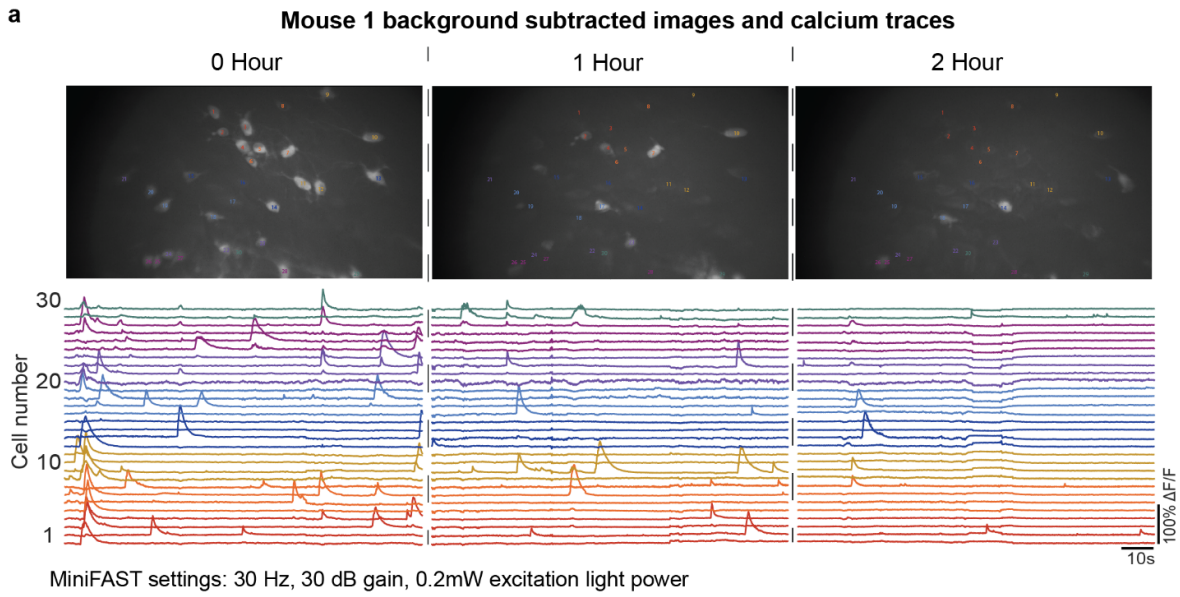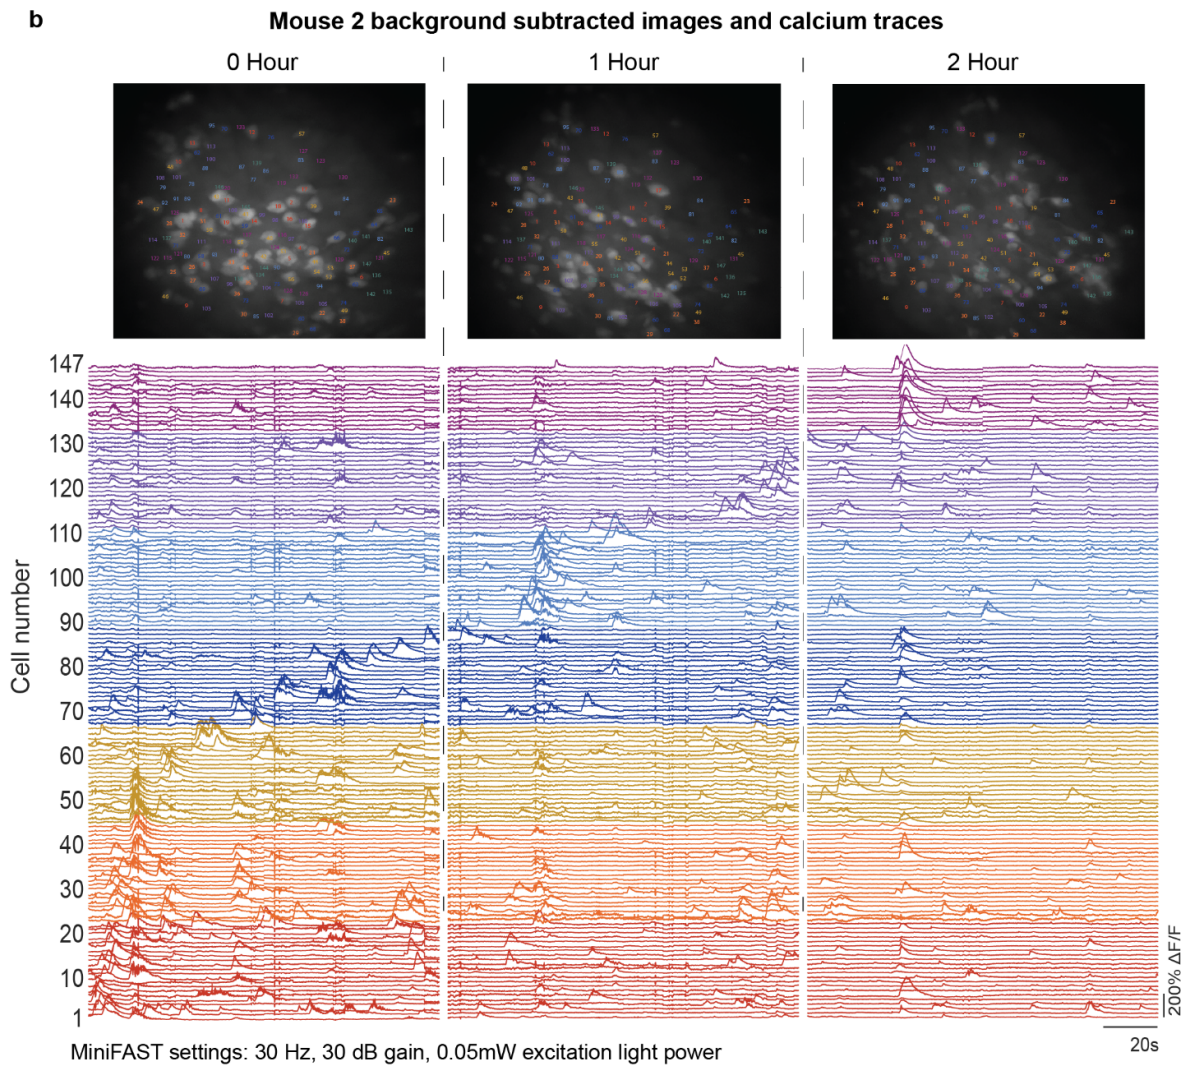

**Supplementary Figure 5: Long-term (1-month) calcium imaging in CA1 of AAV-GCaMP6f mice**

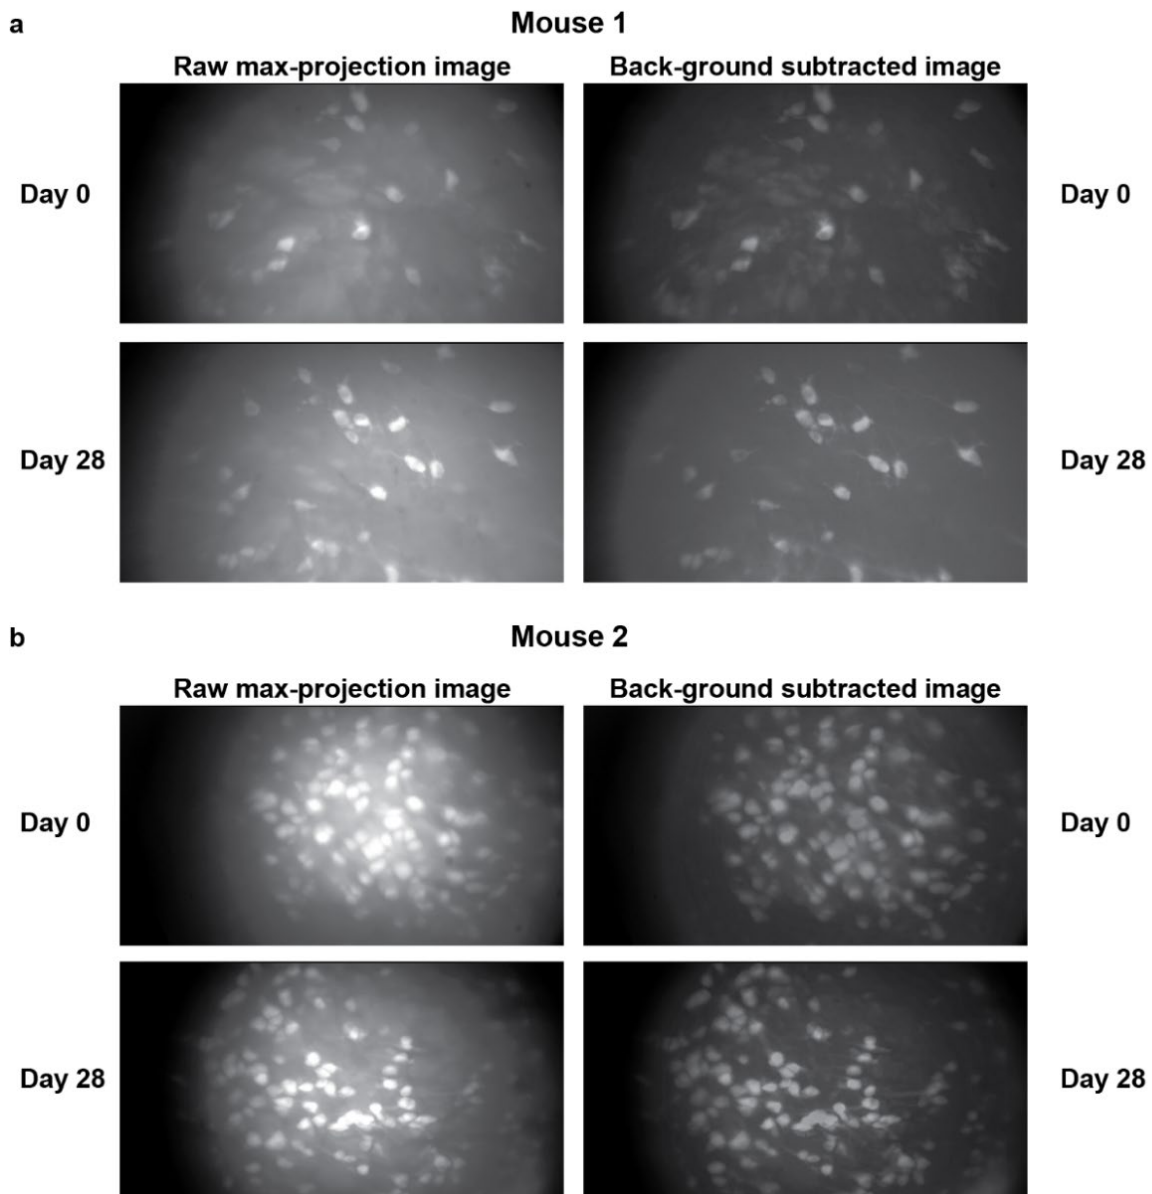

**Supplementary Figure 6: Long-term (4-month) calcium imaging in CA1 of transgenic Thy1-GCaMP6f GP5.17 mice**

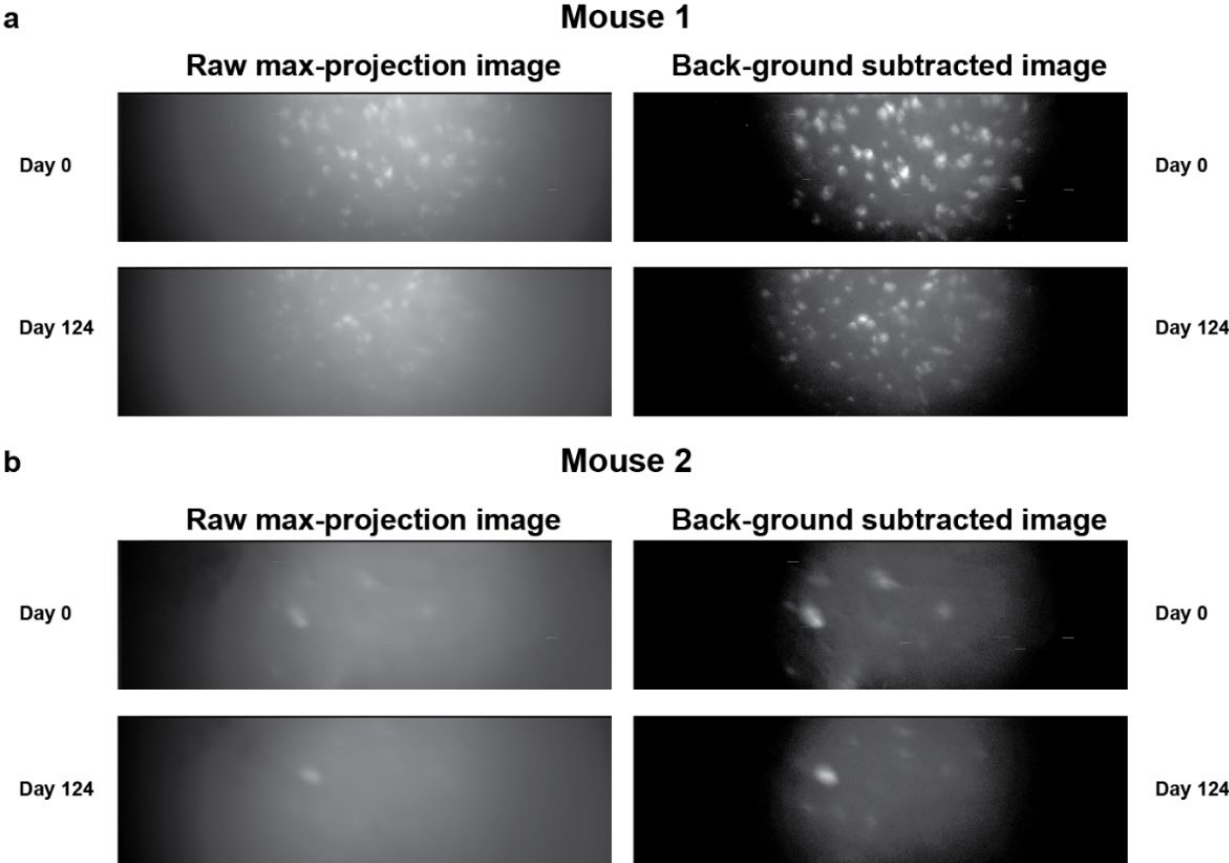

Supplement: Supplementary file [file media-1.pdf]
